# Supplementary material for: Thermo-enhanced ring-opening polymerization of ε-caprolactone: the synthesis, characterization, and catalytic behavior of aluminum hydroquinolin-8-olates
Source: Royal Society of Chemistry journal article supplement (doi:10.1039/c7dt01720k), 2017-01-01
Supplement: c7dt01720k1.pdf [file c7dt01720k1.pdf]

## SUPPORTING INFORMATION

### THERMO-ENHANCED RING-OPENING POLYMERIZATION OF $\epsilon$ -CAPROLACTONE: THE SYNTHESIS, CHARACTERIZATION AND CATALYTIC BEHAVIOR OF ALUMINUM HYDROQUINOLIN-8-OLATES

Qiurui Zhang,<sup>a,b,c</sup> Wenjuan Zhang,<sup>\*,a</sup> Natesan Mannangatti Rajendran,<sup>b</sup> Tongling Liang,<sup>b</sup> and Wen-Hua Sun<sup>\*,b,c</sup>

<sup>a</sup>School of Materials Science and Engineering, Beijing Institute of Fashion Technology, Beijing 100029, China

<sup>b</sup>Key Laboratory of Engineering Plastics, Institute of Chemistry, Chinese Academy of Sciences, Beijing 100190, China

<sup>c</sup> CAS Research/Education Center for Excellence in Molecular Sciences, University of Chinese Academy of Sciences, Beijing 100049, China

**Corresponding author:** W.-H.Sun, [whsun@iccas.ac.cn](mailto:whsun@iccas.ac.cn); W. Zhang, [zhangwj@bift.edu.cn](mailto:zhangwj@bift.edu.cn)

**Figure S1.** The <sup>1</sup>H NMR and <sup>13</sup>C NMR spectrum of **L1**

**Figure S2.** The <sup>1</sup>H NMR and <sup>13</sup>C NMR spectrum of **L2**

**Figure S3.** The <sup>1</sup>H NMR and <sup>13</sup>C NMR spectrum of **L3**

**Figure S4.** The <sup>1</sup>H NMR and <sup>13</sup>C NMR spectrum of **L4**

**Figure S5.** The <sup>1</sup>H NMR and <sup>13</sup>C NMR spectrum of **L5**

**Figure S6.** The <sup>1</sup>H NMR and <sup>13</sup>C NMR spectrum of **C1**

**Figure S7.** The <sup>1</sup>H NMR and <sup>13</sup>C NMR spectrum of **C2**

**Figure S8.** The <sup>1</sup>H NMR and <sup>13</sup>C NMR spectrum of **C3**

**Figure S9.** The <sup>1</sup>H NMR and <sup>13</sup>C NMR spectrum of **C4**

**Figure S10.** The <sup>1</sup>H NMR and <sup>13</sup>C NMR spectrum of **C5**

**Figure S11.** The <sup>1</sup>H NMR and <sup>13</sup>C NMR spectrum of **C6**

**Figure S12.** The <sup>1</sup>H NMR and <sup>13</sup>C NMR spectrum of **C7**

**Figure S13.** The <sup>1</sup>H NMR and <sup>13</sup>C NMR spectrum of **C8**

**Figure S14.** The <sup>1</sup>H NMR and MALDI-TOF spectrum of PCL by **C3**

**Figure S15.** The <sup>1</sup>H NMR and MALDI-TOF spectrum of PCL by **C4**

**Figure S16.** The <sup>1</sup>H NMR and MALDI-TOF spectrum of PCL by **C7**

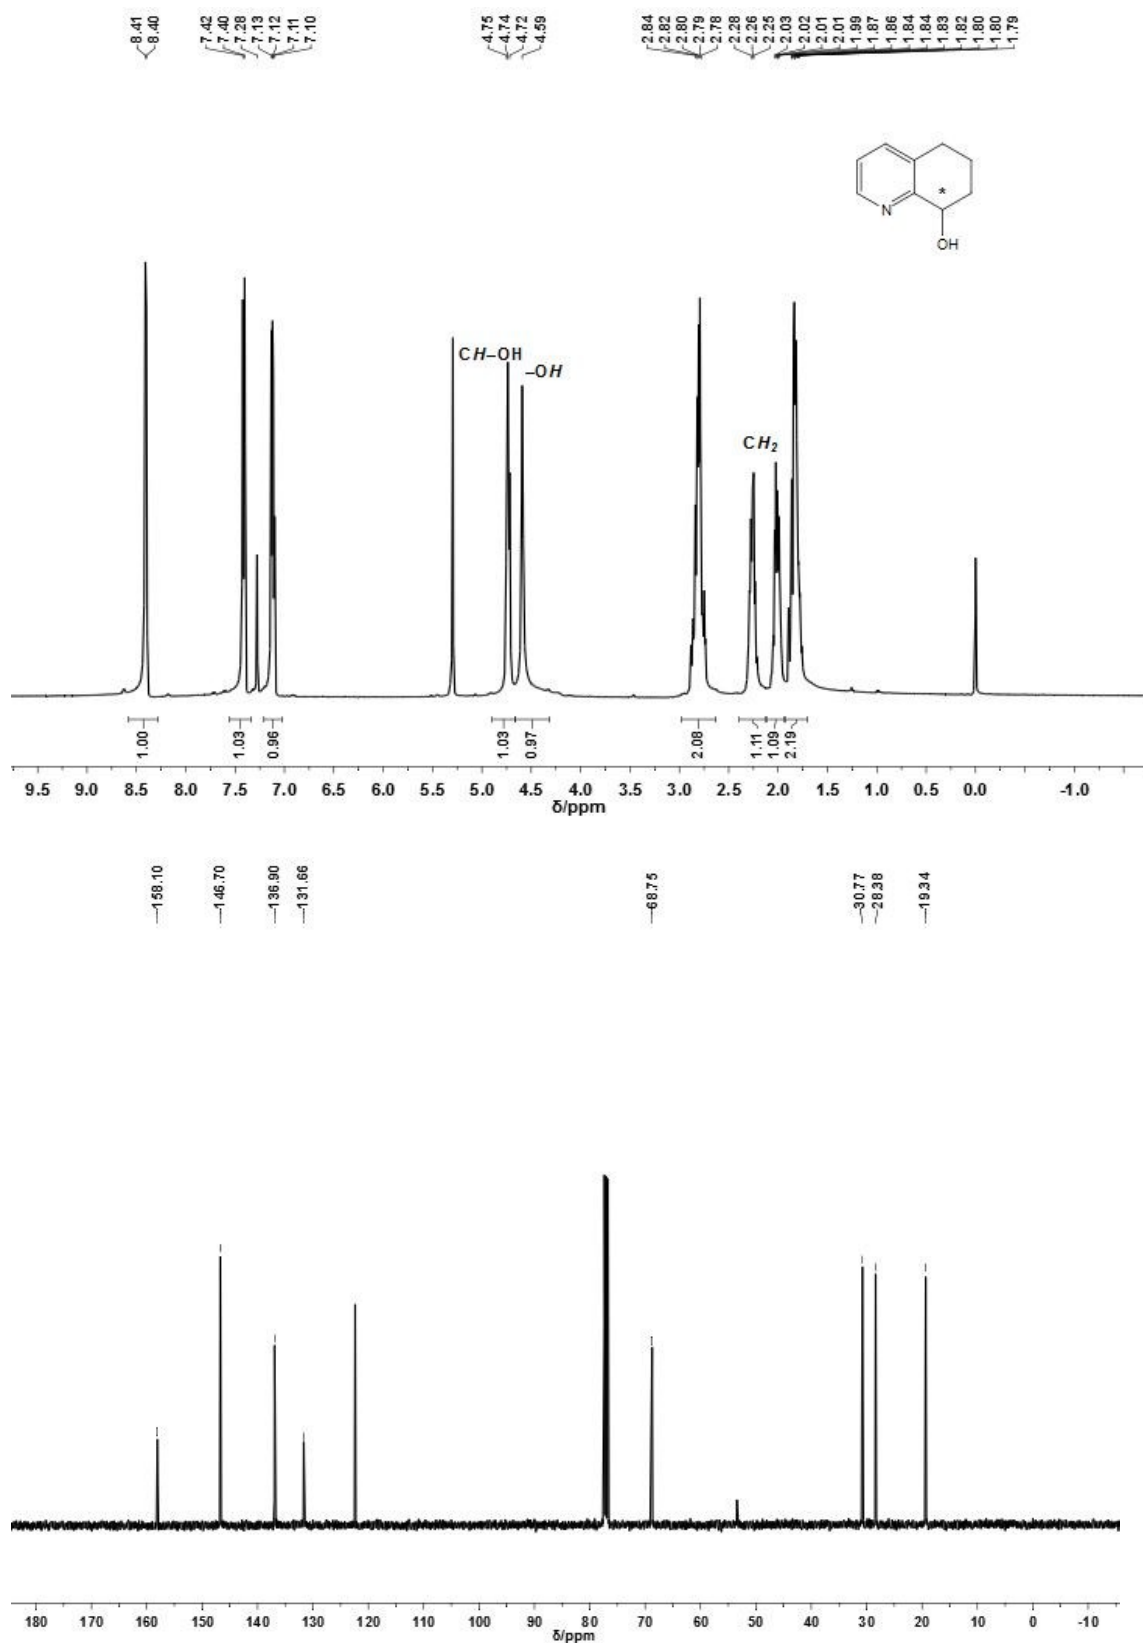

Figure S1. The <sup>1</sup>H NMR and <sup>13</sup>C NMR spectrum of L1

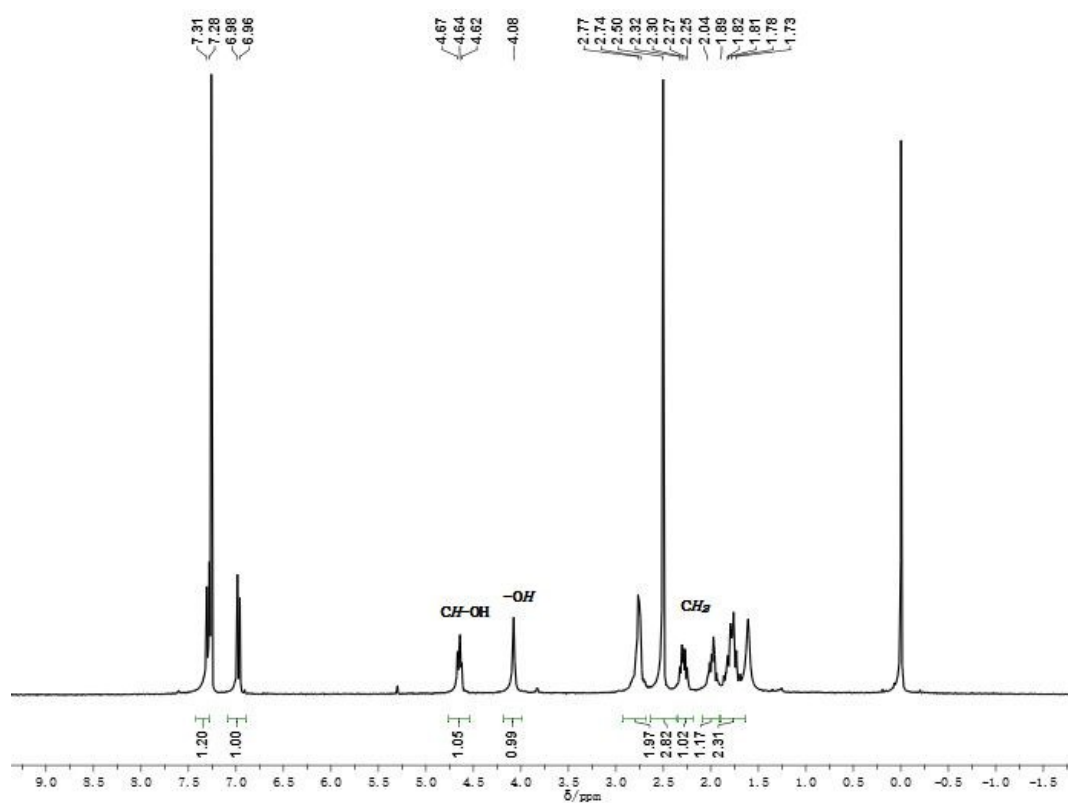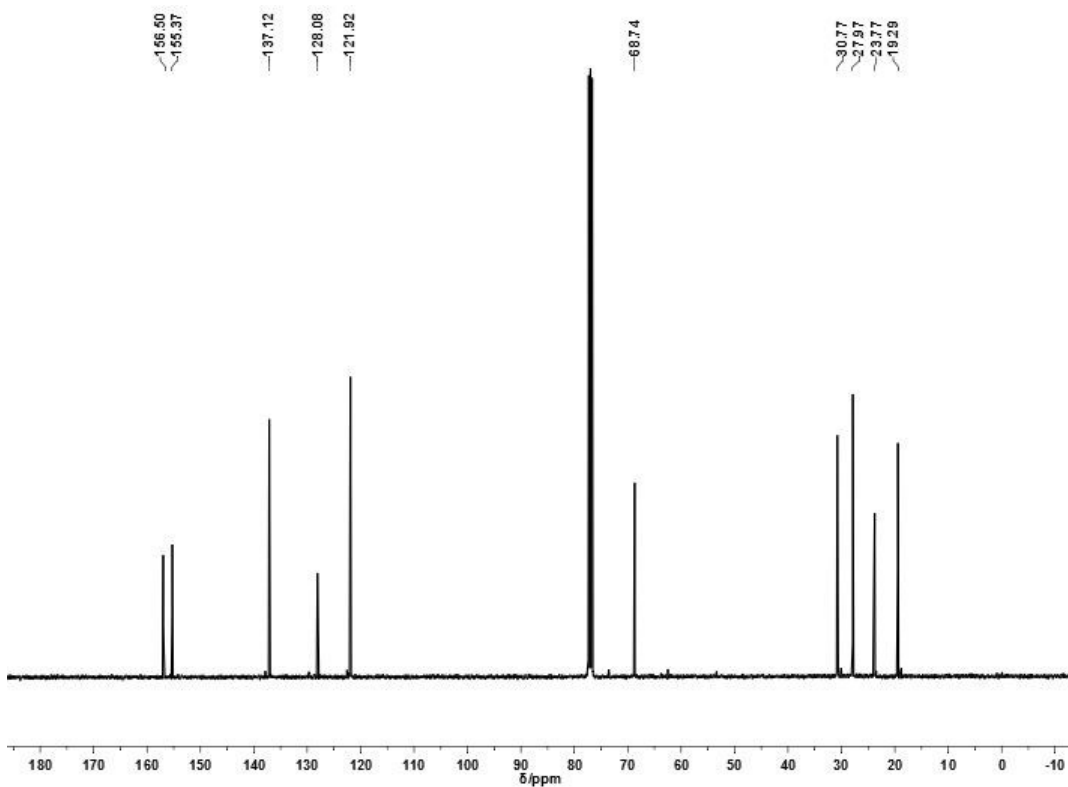

Figure S2. The  $^1\text{H}$  NMR and  $^{13}\text{C}$  NMR spectrum of L2

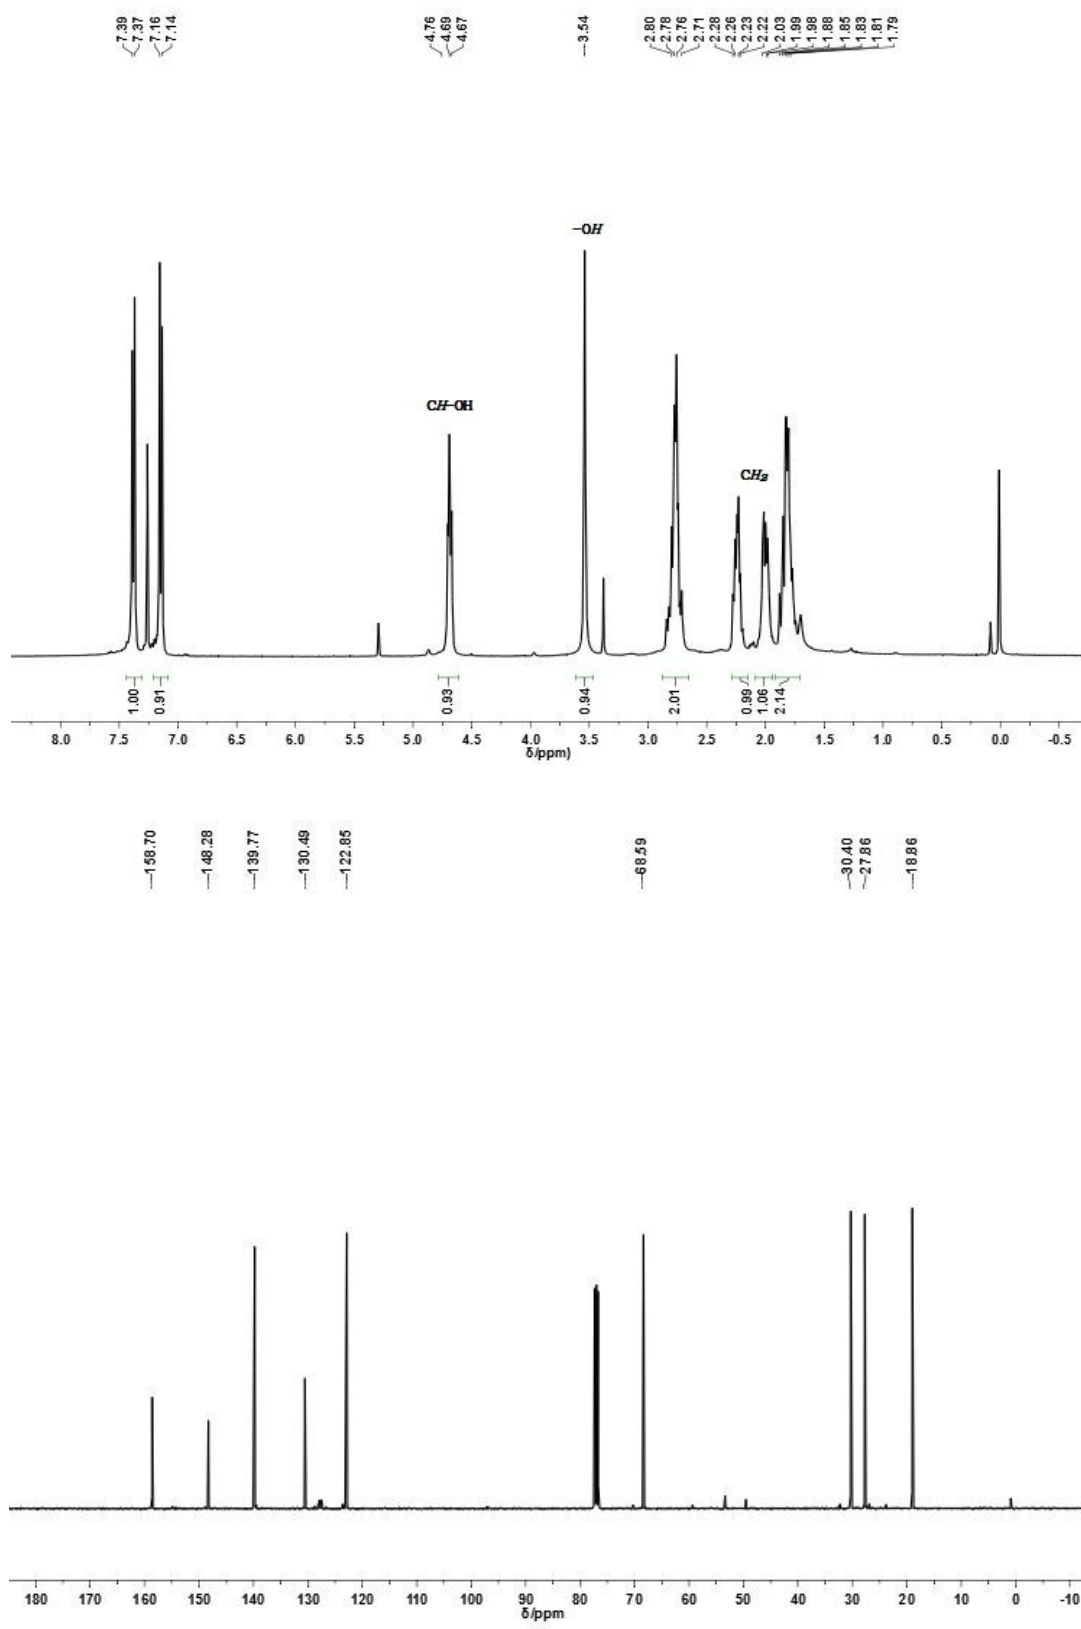

**Figure S3.** The  $^1\text{H}$  NMR and  $^{13}\text{C}$  NMR spectrum of L3

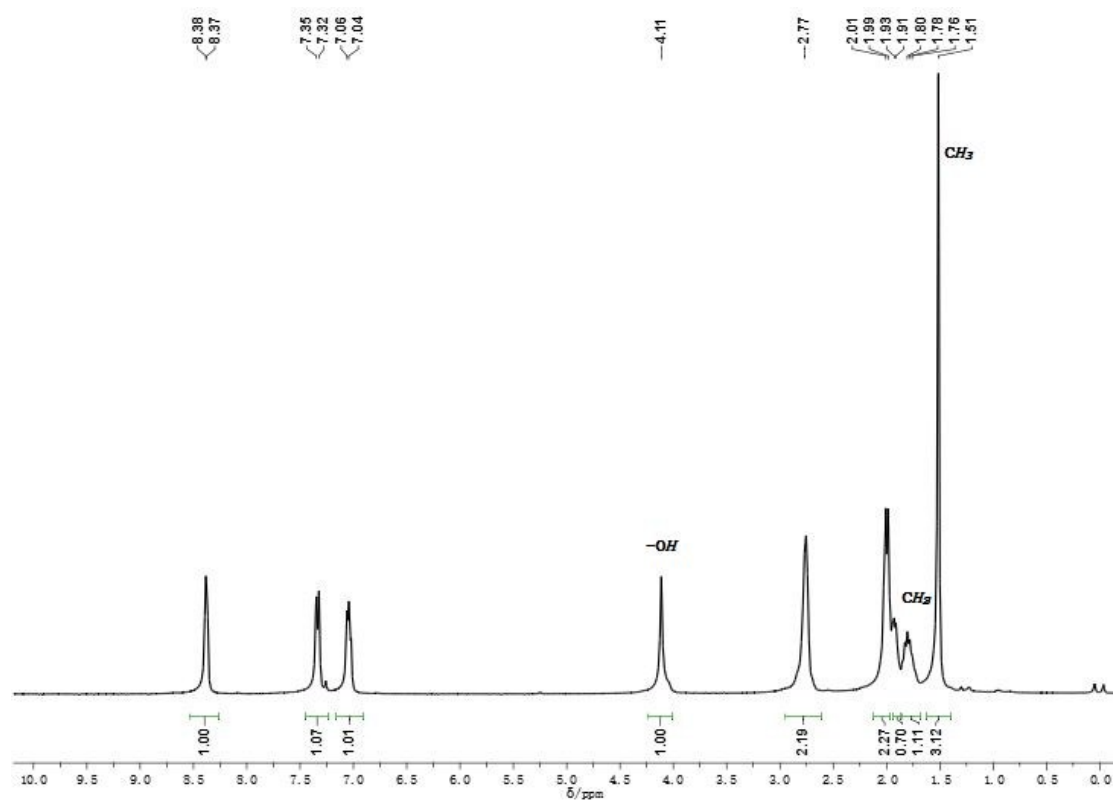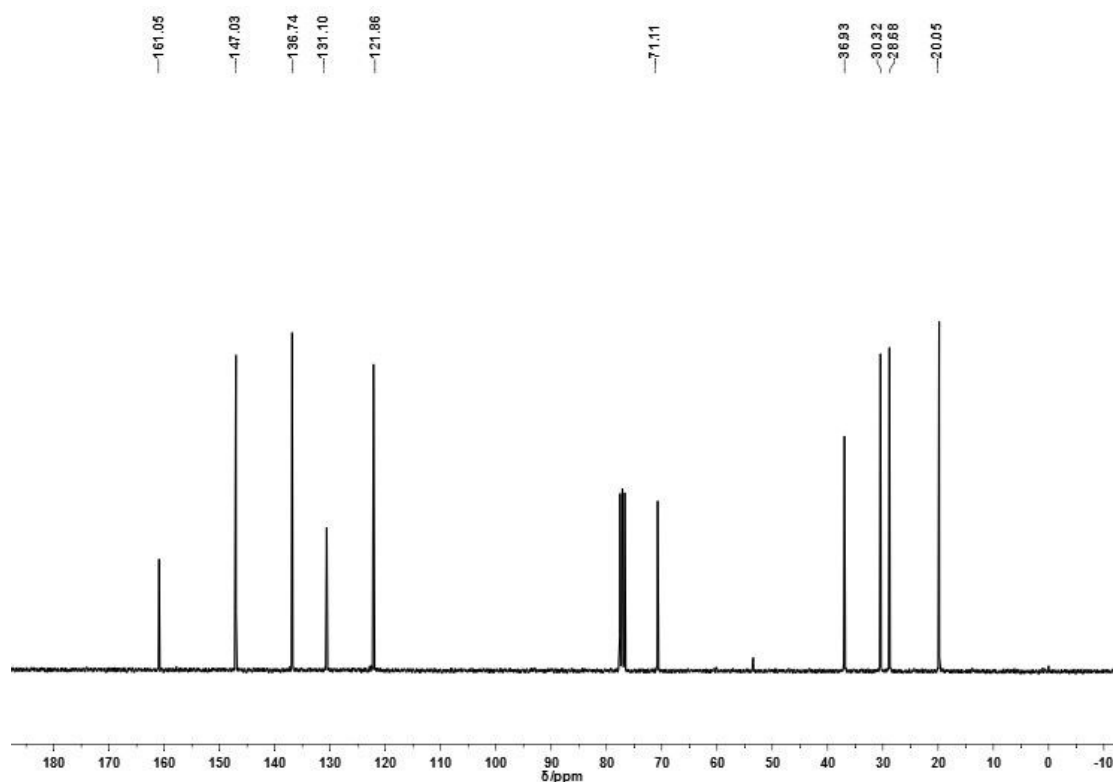

Figure S4. The <sup>1</sup>H NMR and <sup>13</sup>C NMR spectrum of L4

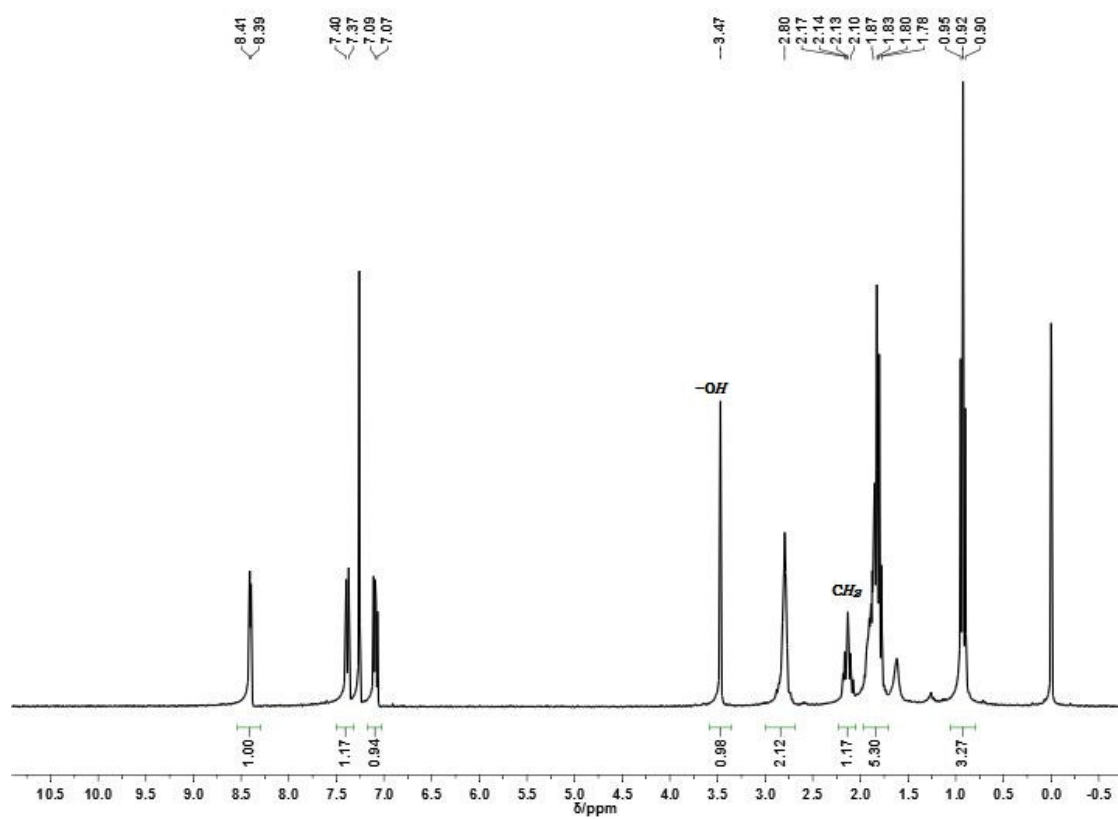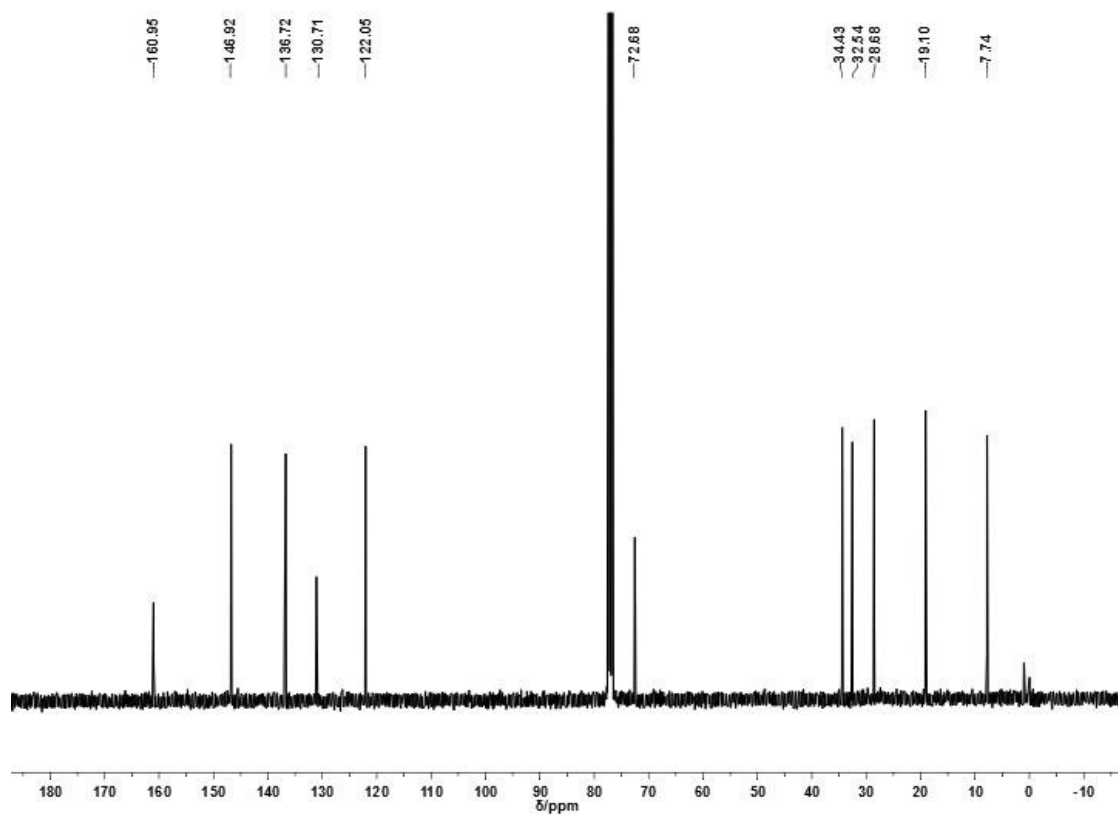

Figure S5. The  $^1\text{H}$  NMR and  $^{13}\text{C}$  NMR spectrum of L5

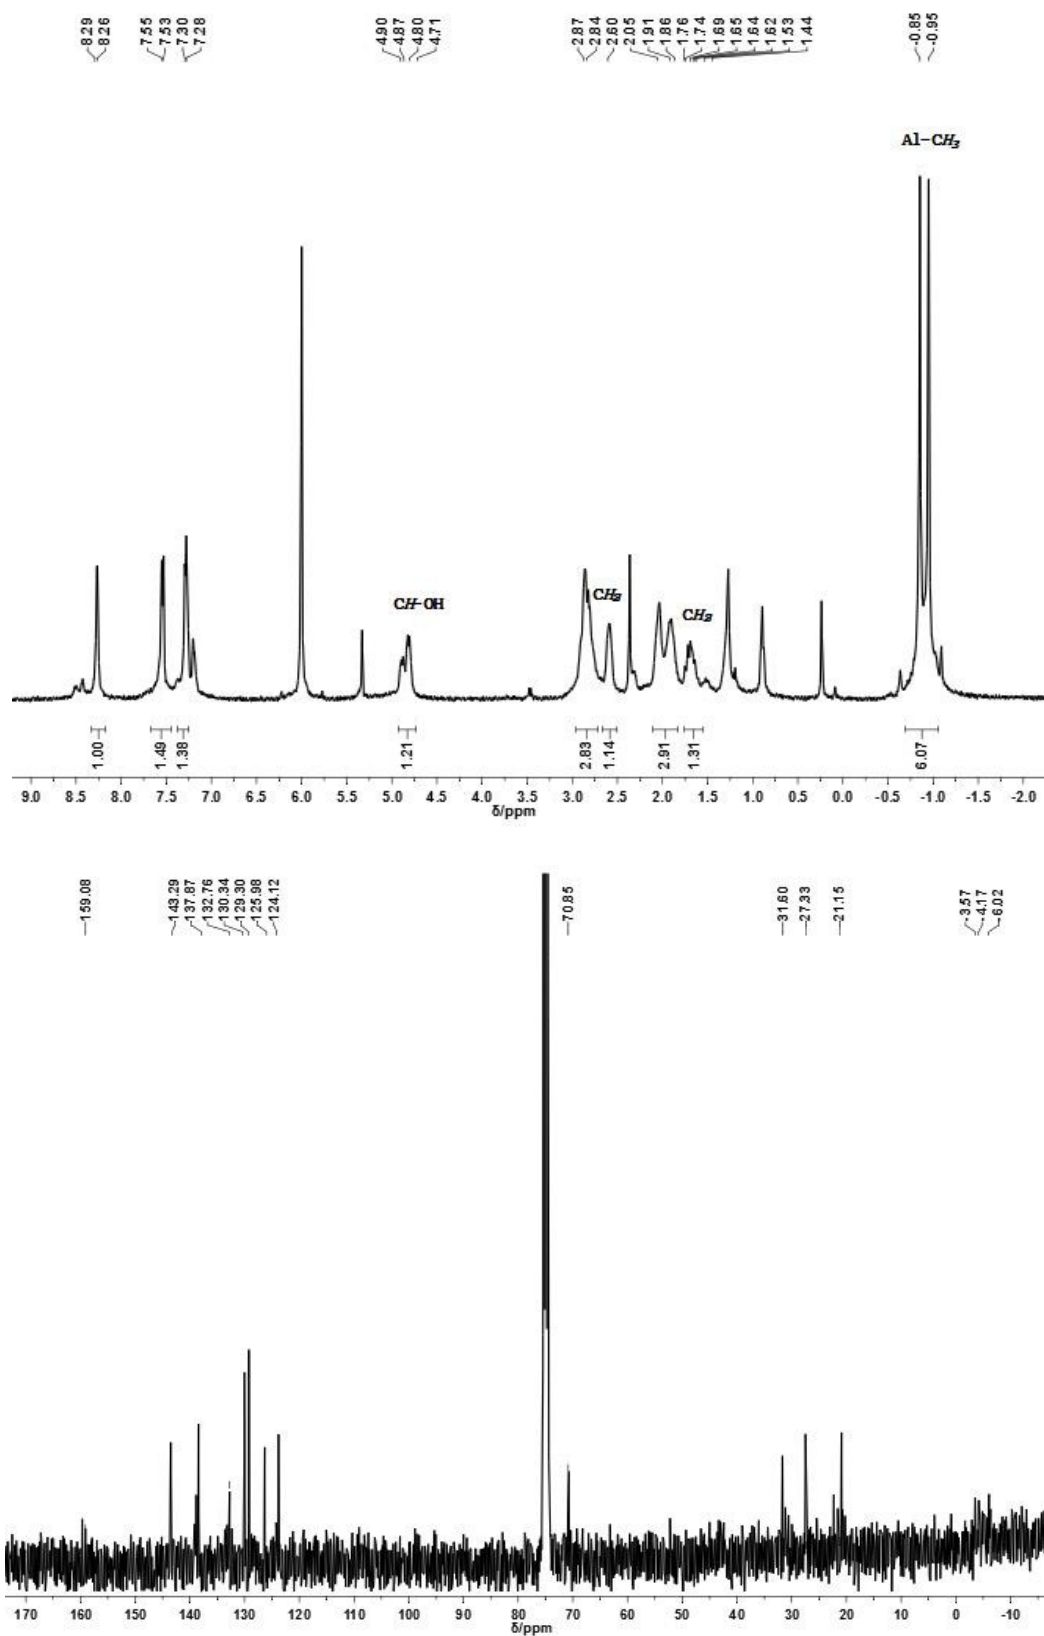

Figure S6. The  $^1\text{H}$  NMR and  $^{13}\text{C}$  NMR spectrum of C1

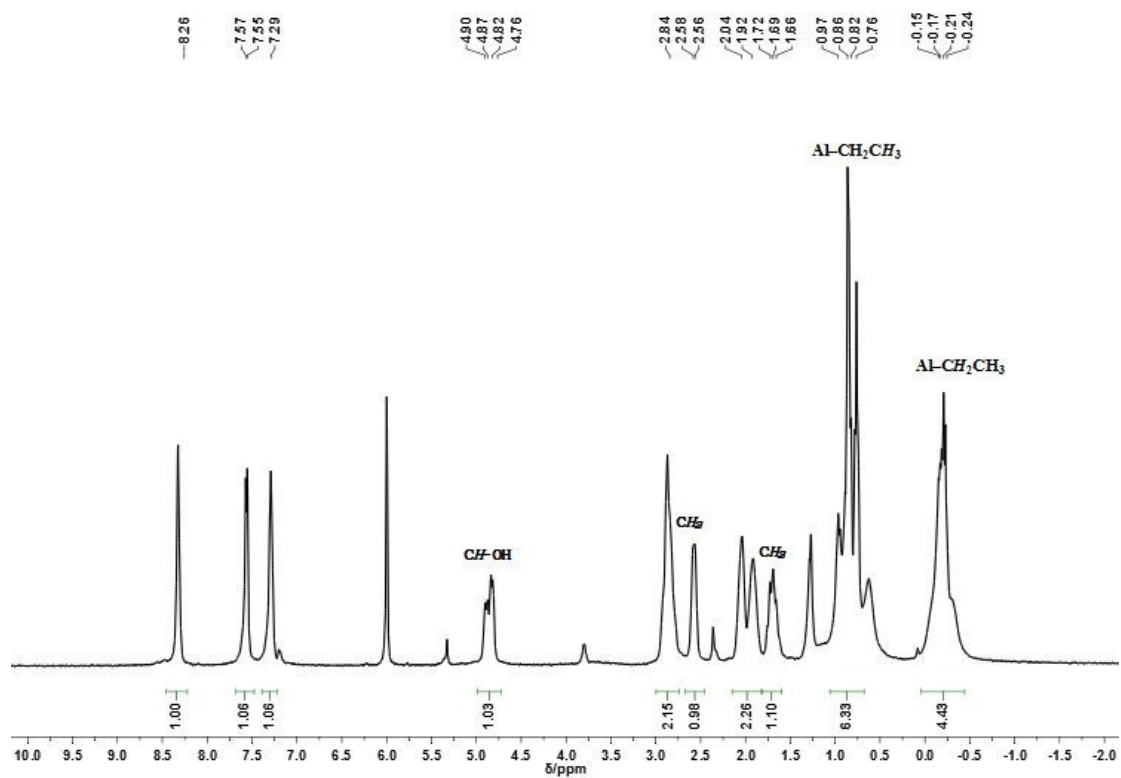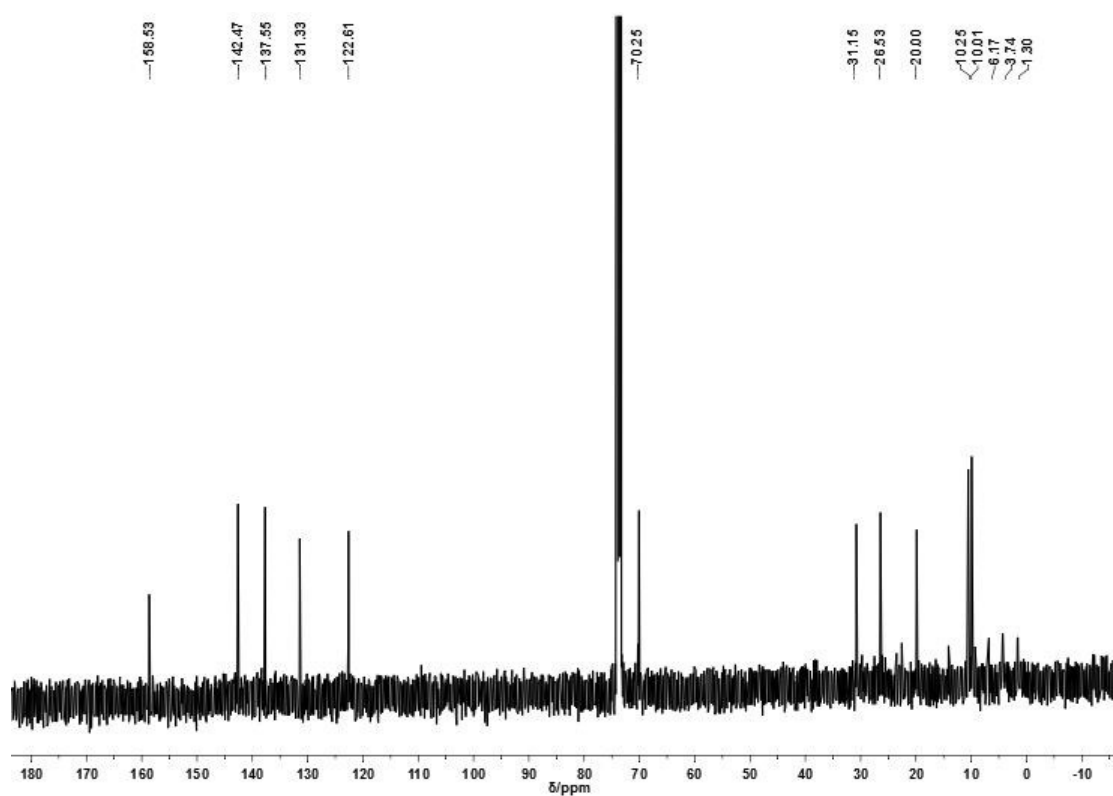

Figure S7. The <sup>1</sup>H NMR and <sup>13</sup>C NMR spectrum of C2



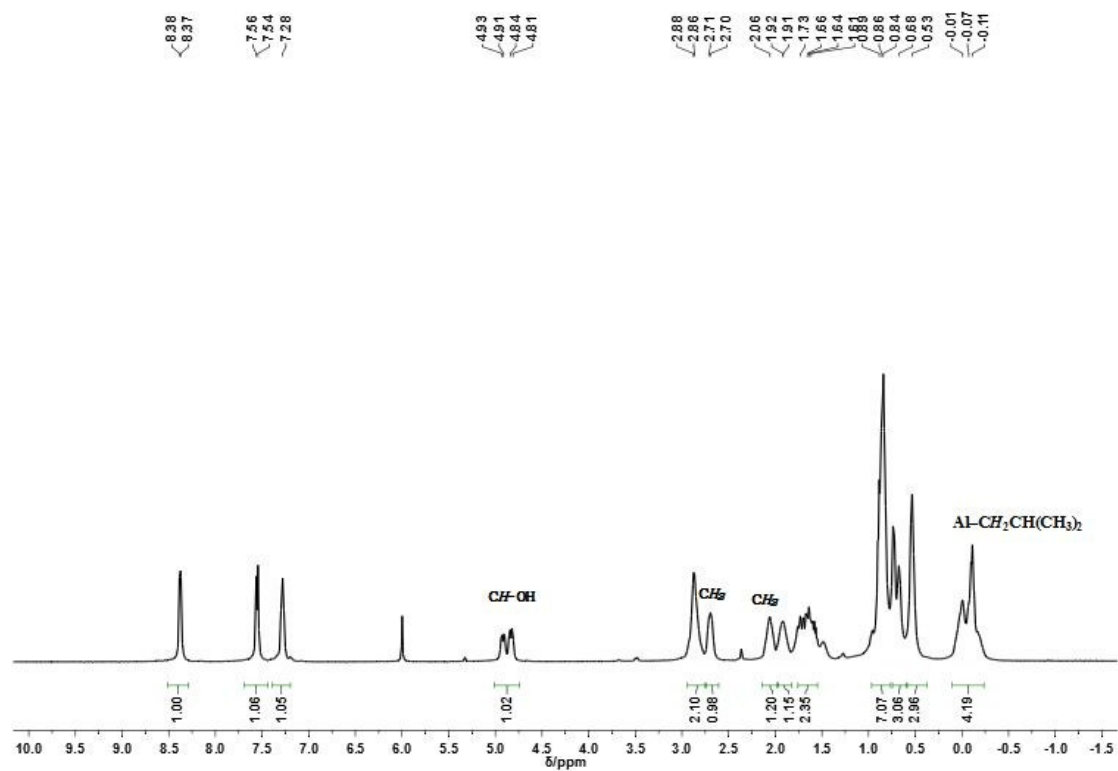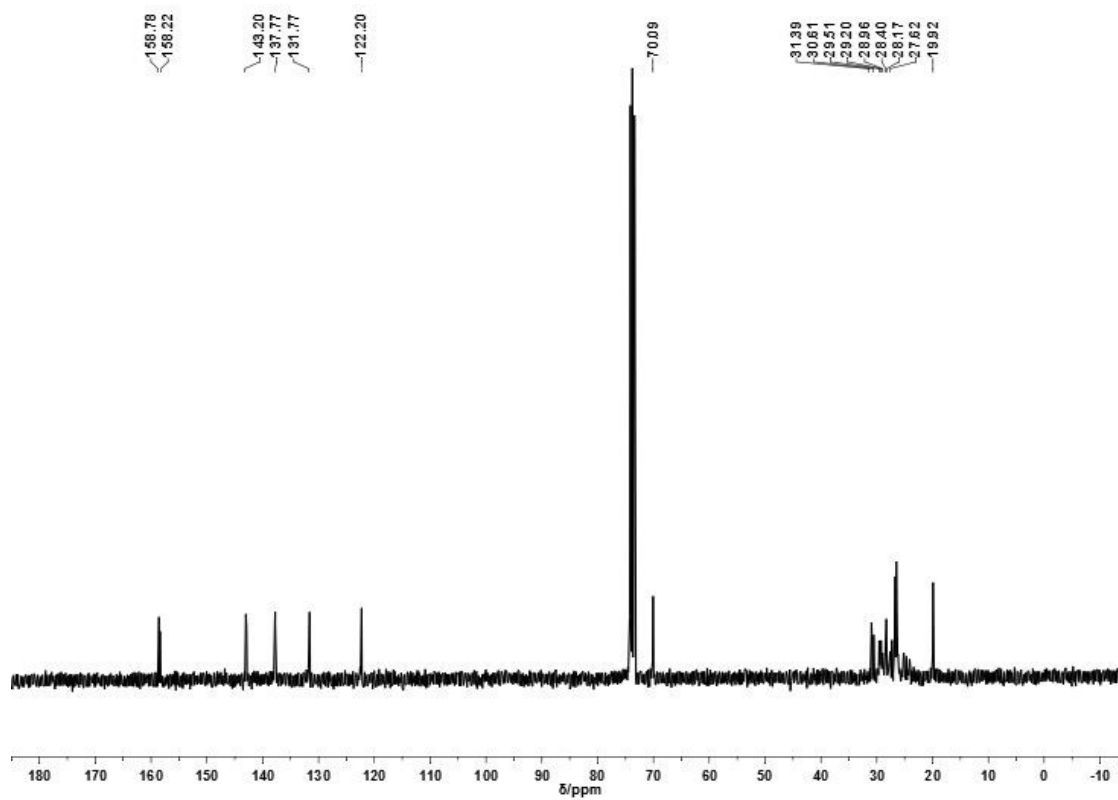

Figure S8. The  $^1\text{H}$  NMR and  $^{13}\text{C}$  NMR spectrum of C3

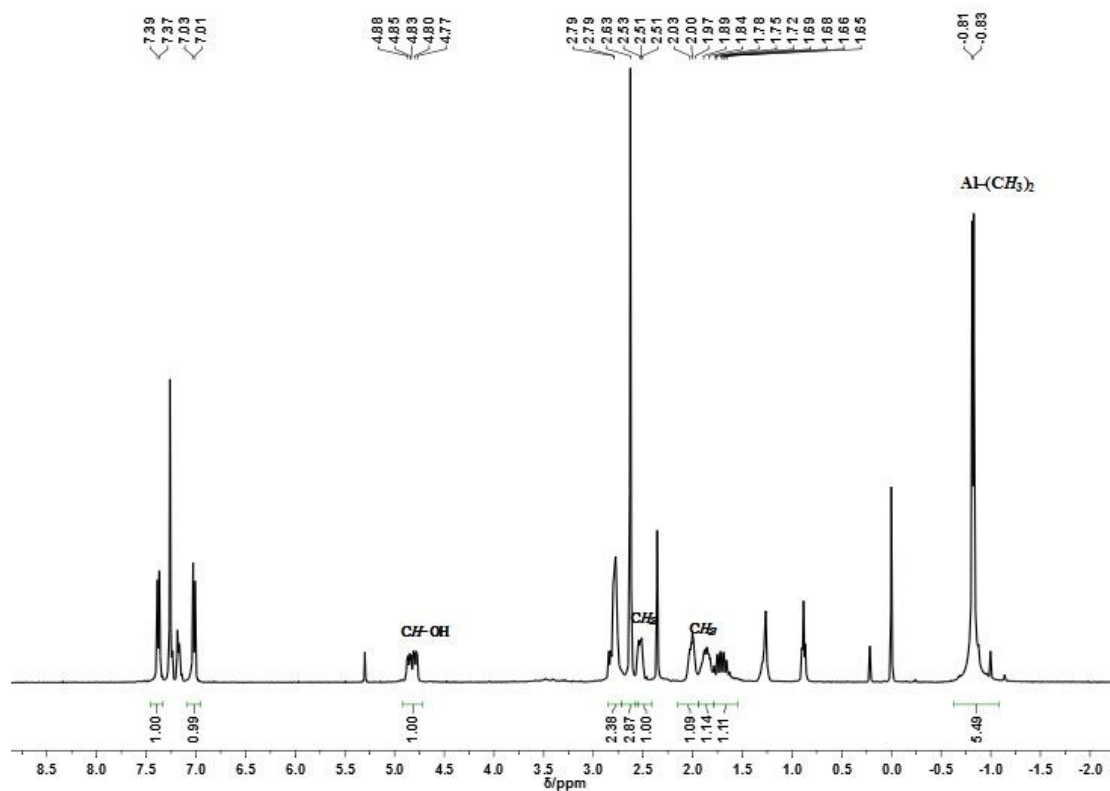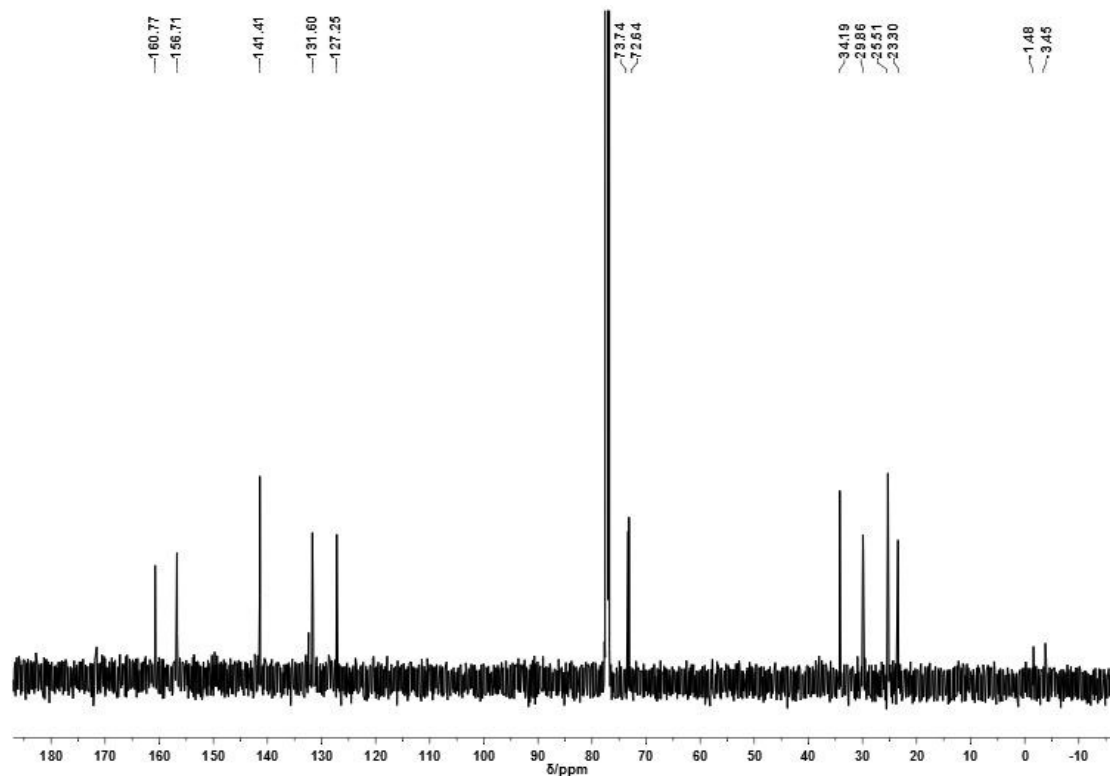

**Figure S9.** The <sup>1</sup>H NMR and <sup>13</sup>C NMR spectrum of C4

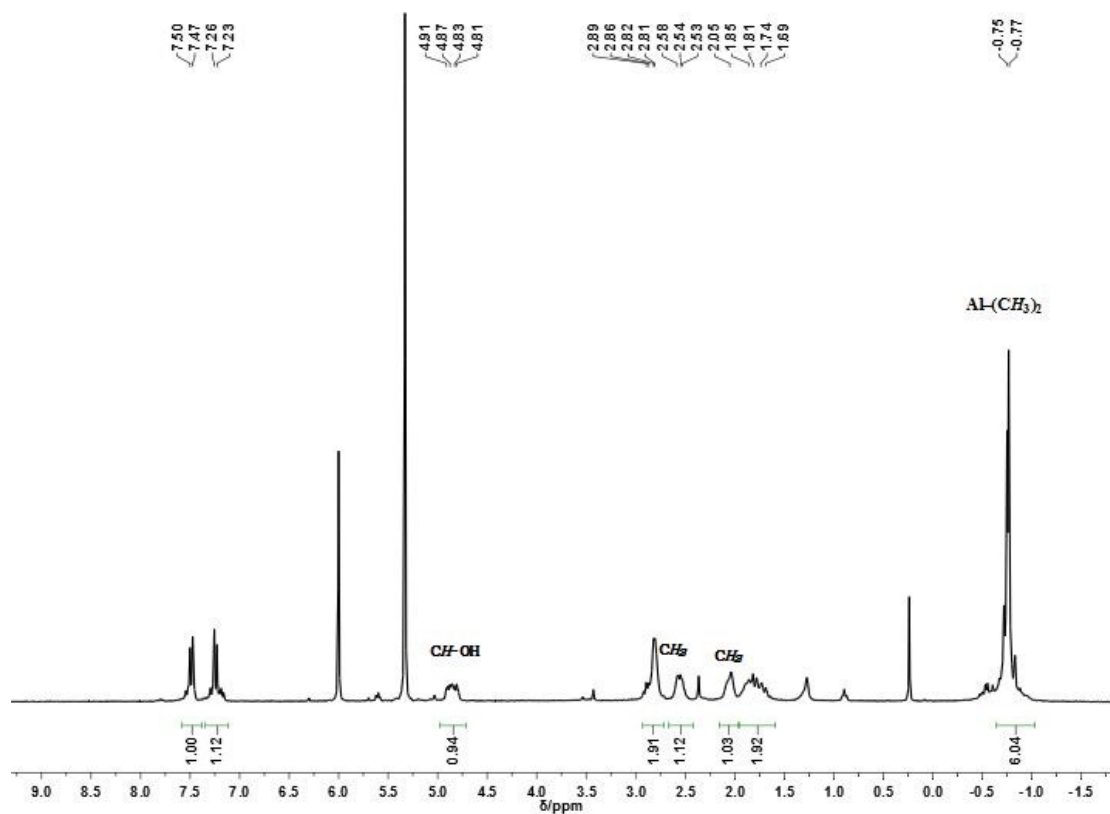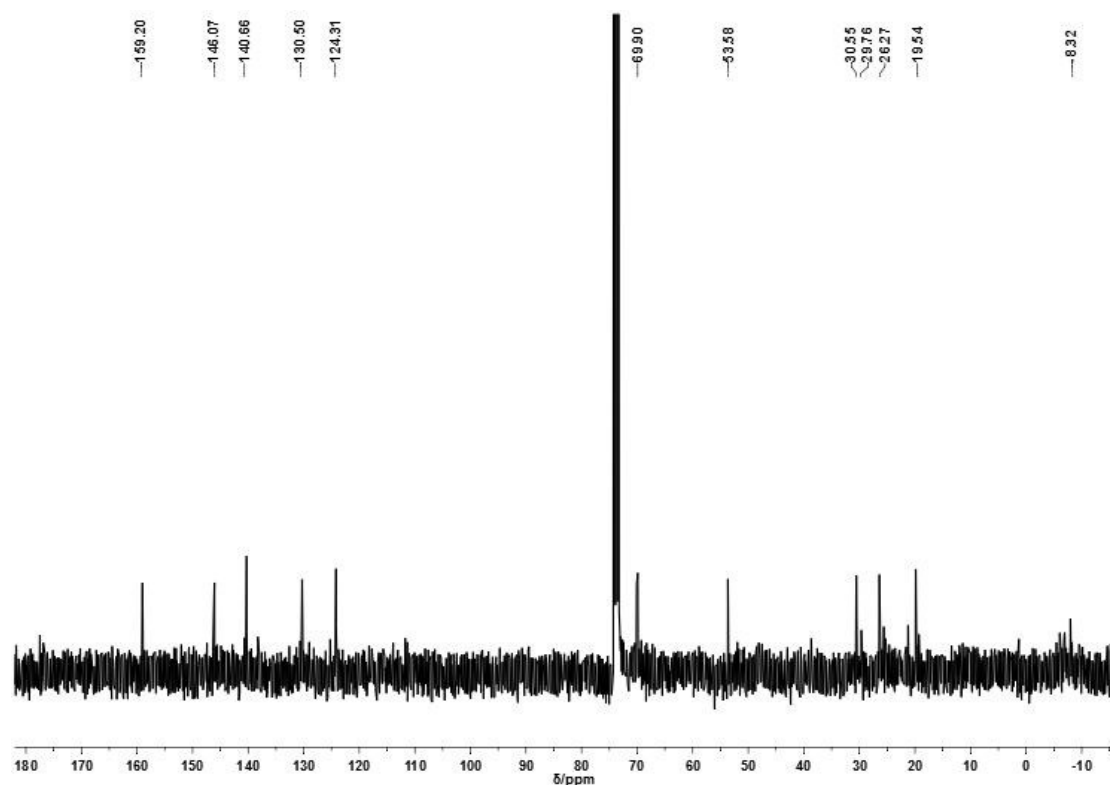

Figure S10. The <sup>1</sup>H NMR and <sup>13</sup>C NMR spectrum of C5

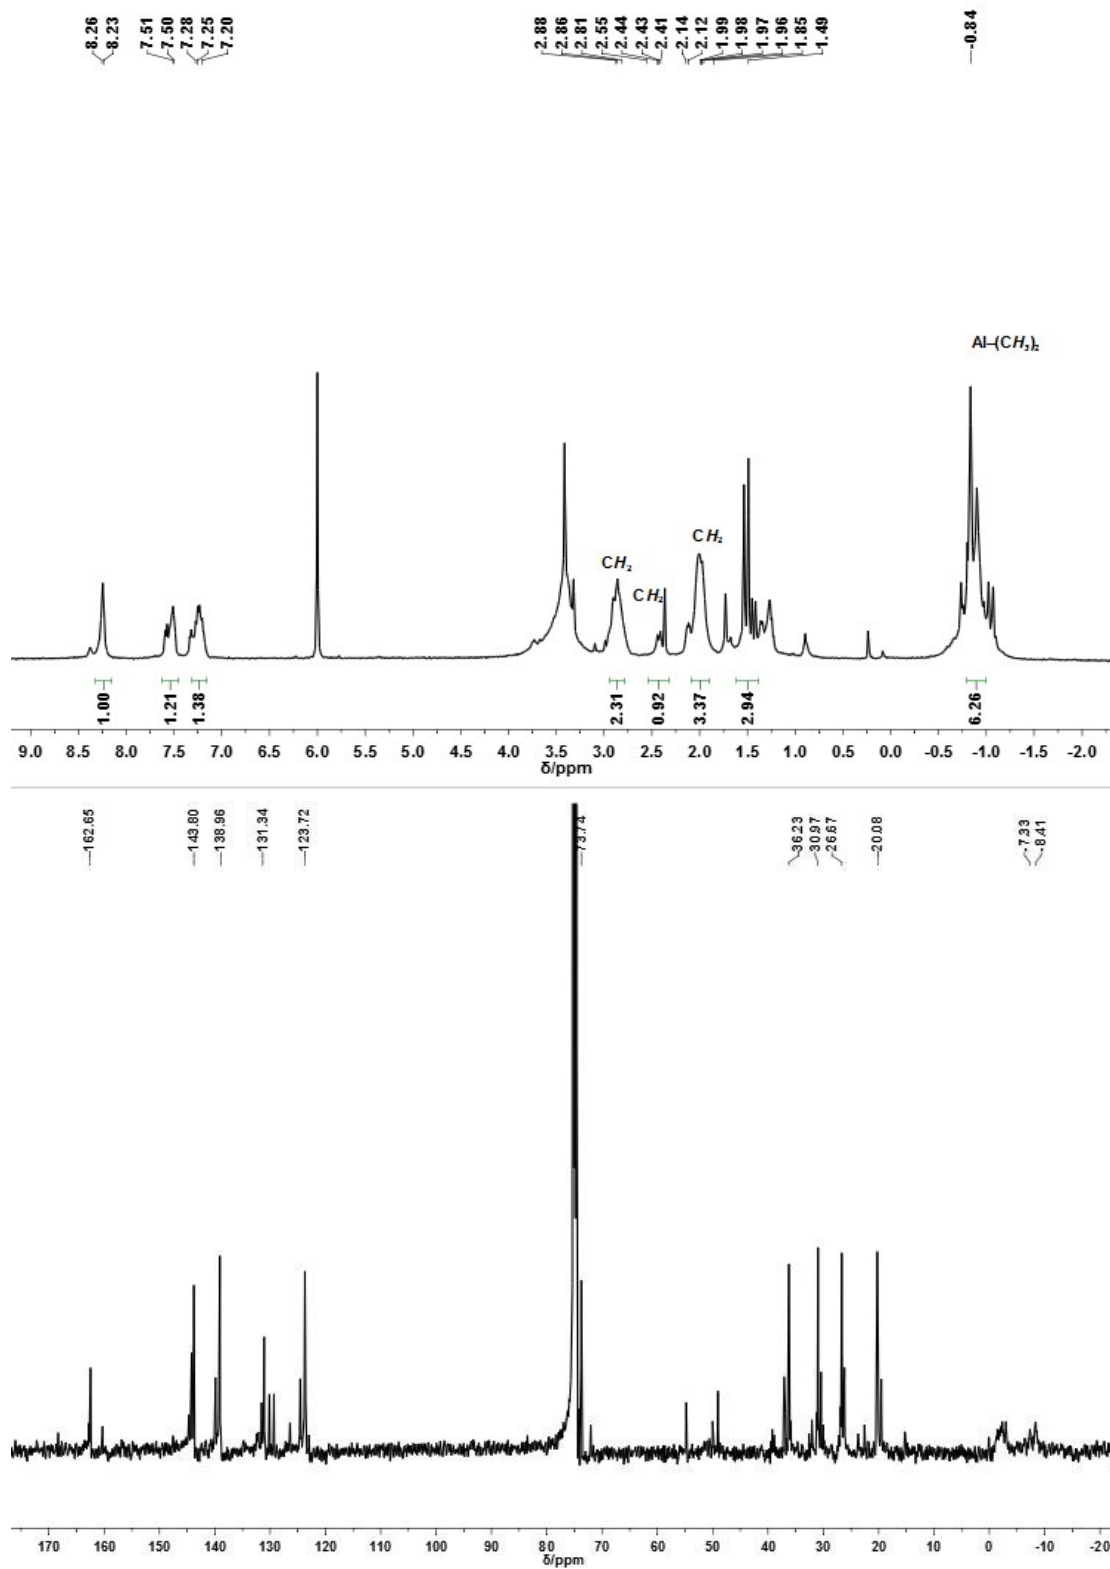

Figure S11. The  $^1\text{H}$  NMR and  $^{13}\text{C}$  NMR spectrum of C6

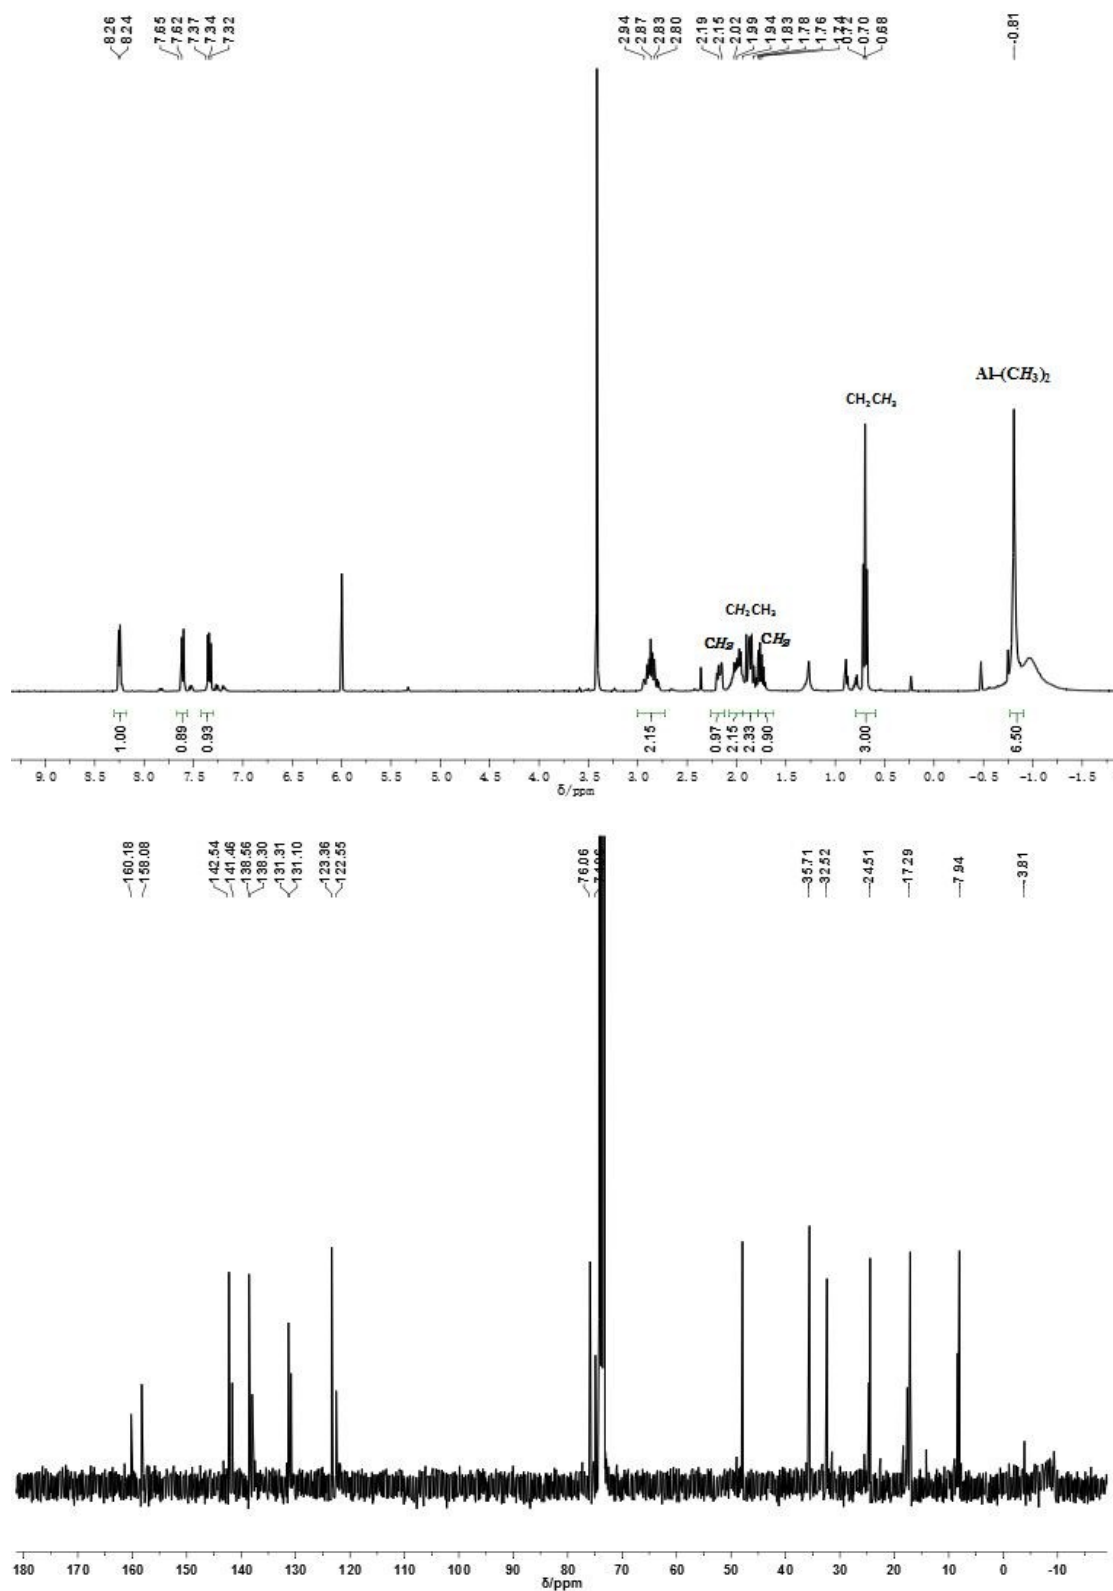

Figure S12. The  $^1\text{H}$  NMR and  $^{13}\text{C}$  NMR spectrum of C7

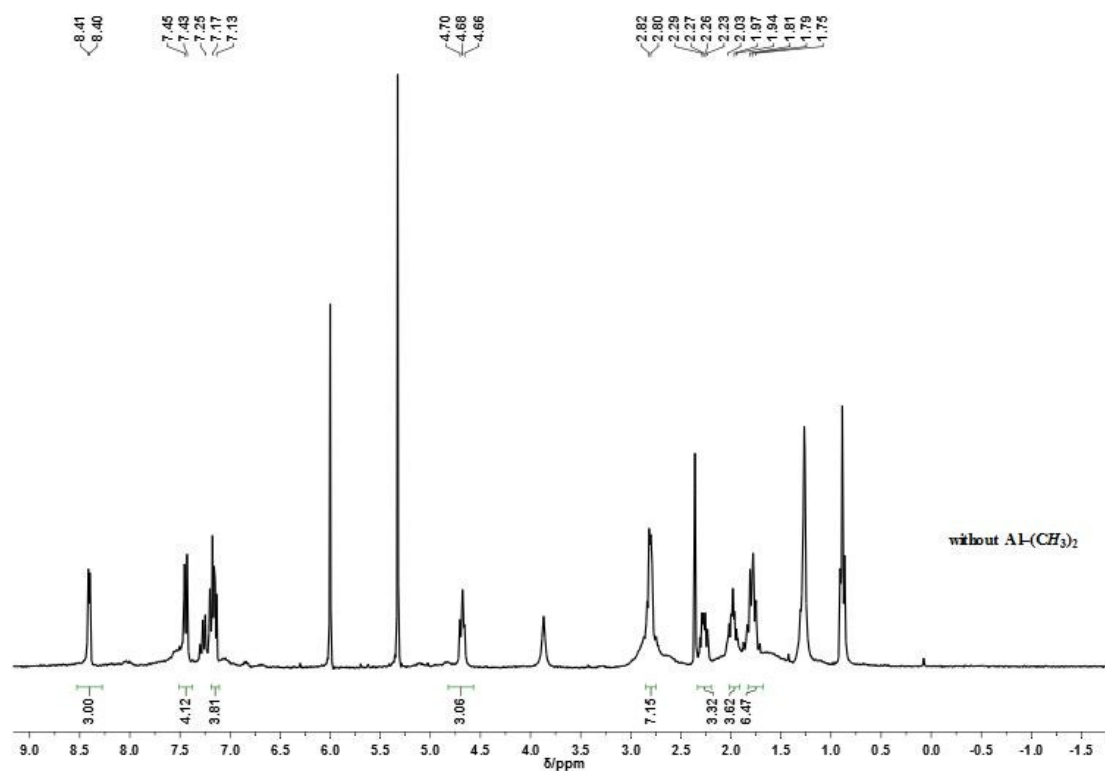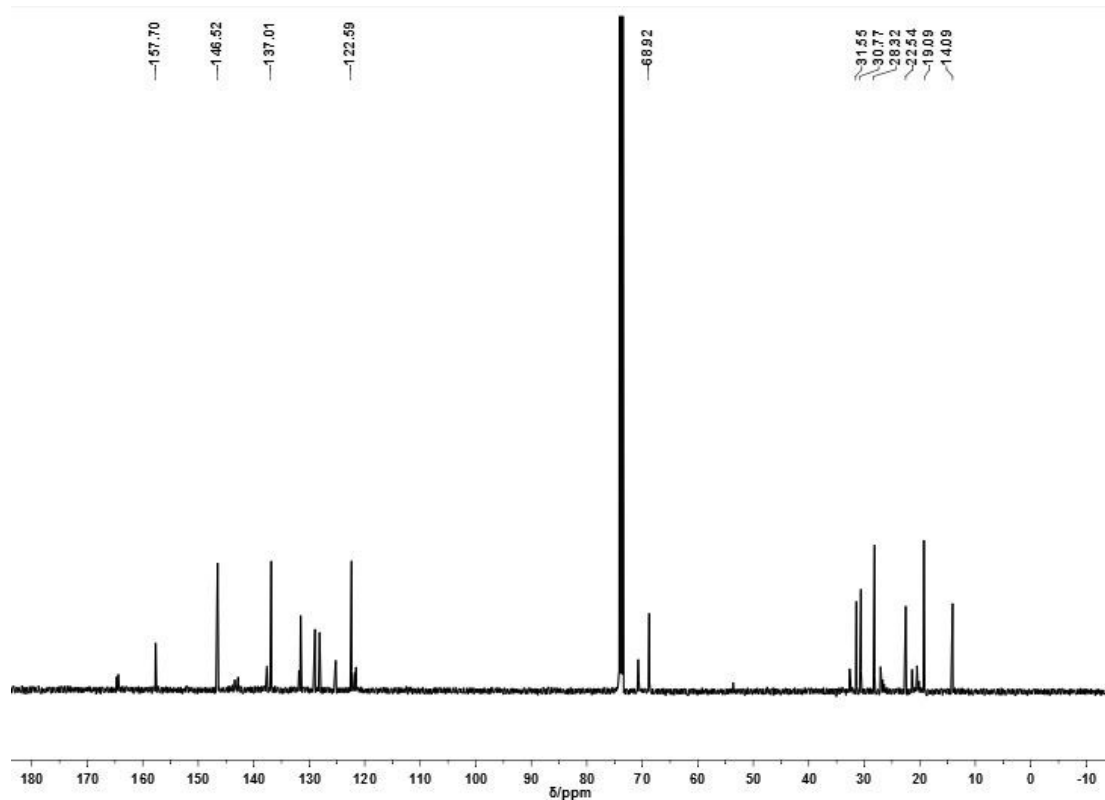

**Figure S13.** The <sup>1</sup>H NMR and <sup>13</sup>C NMR spectrum of **C8**

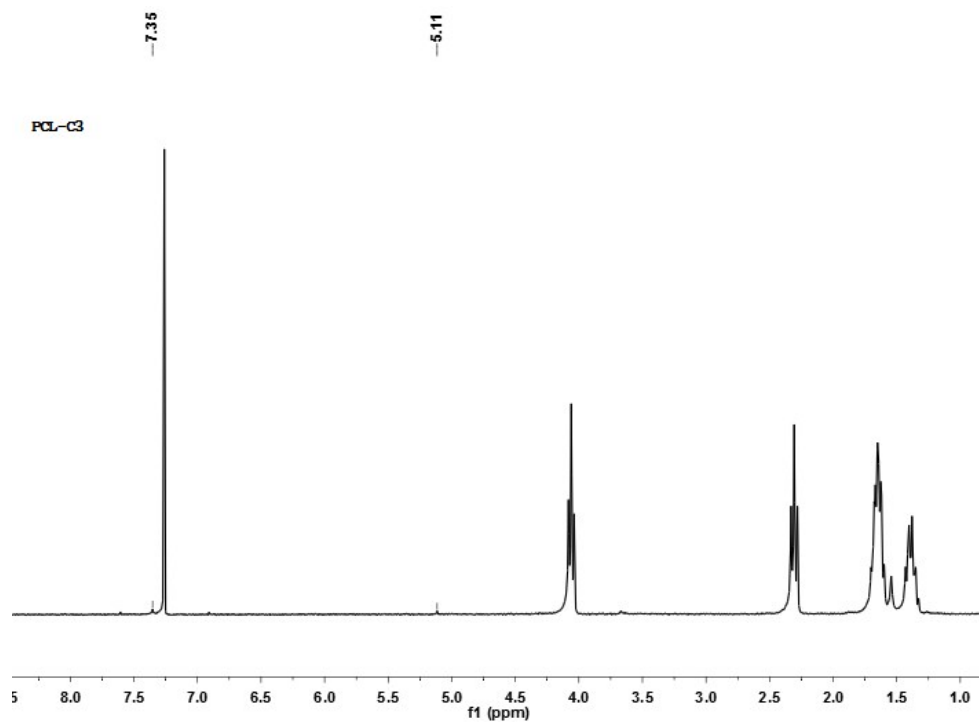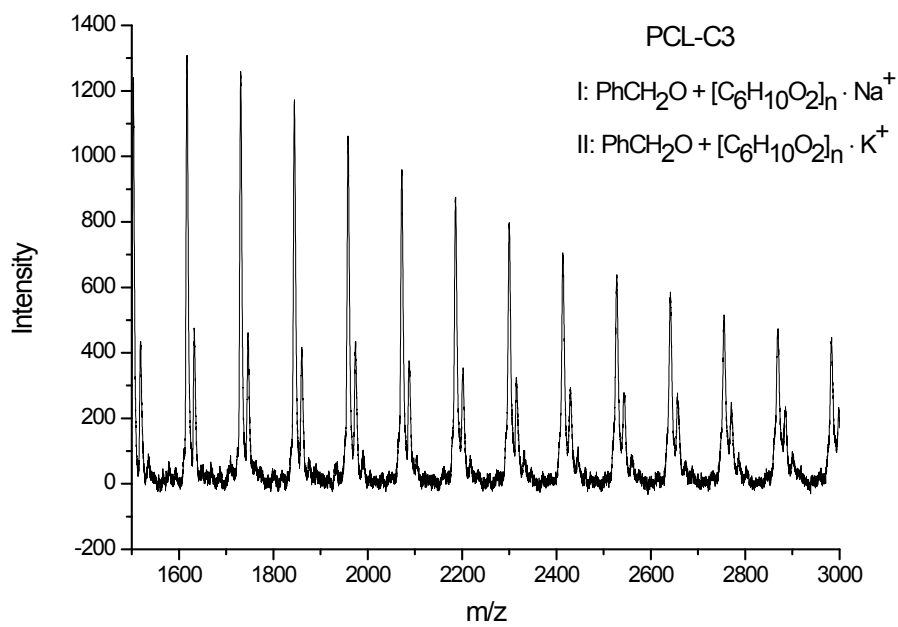

**Figure S14.** The <sup>1</sup>H NMR and MALDI-TOF spectrum of PCL by C3

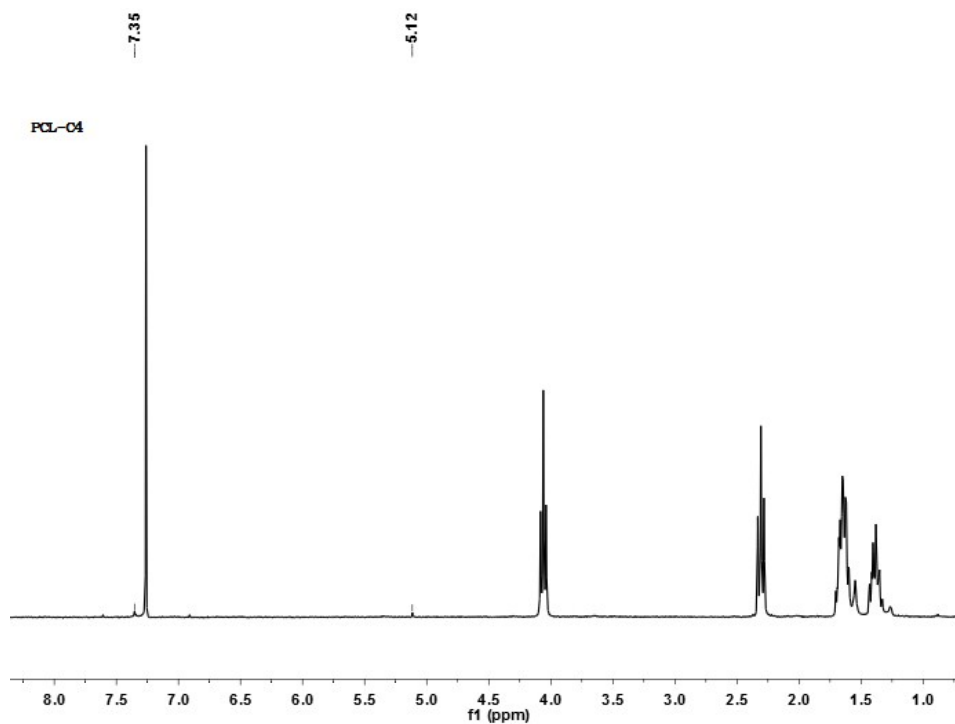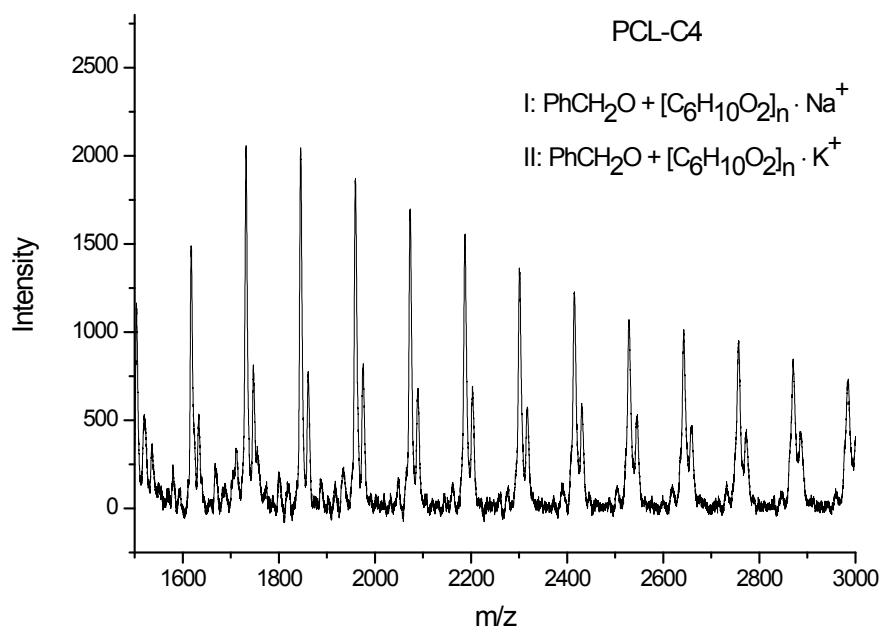

**Figure S15.** The  $^1\text{H}$  NMR and MALDI-TOF spectrum of PCL by C4



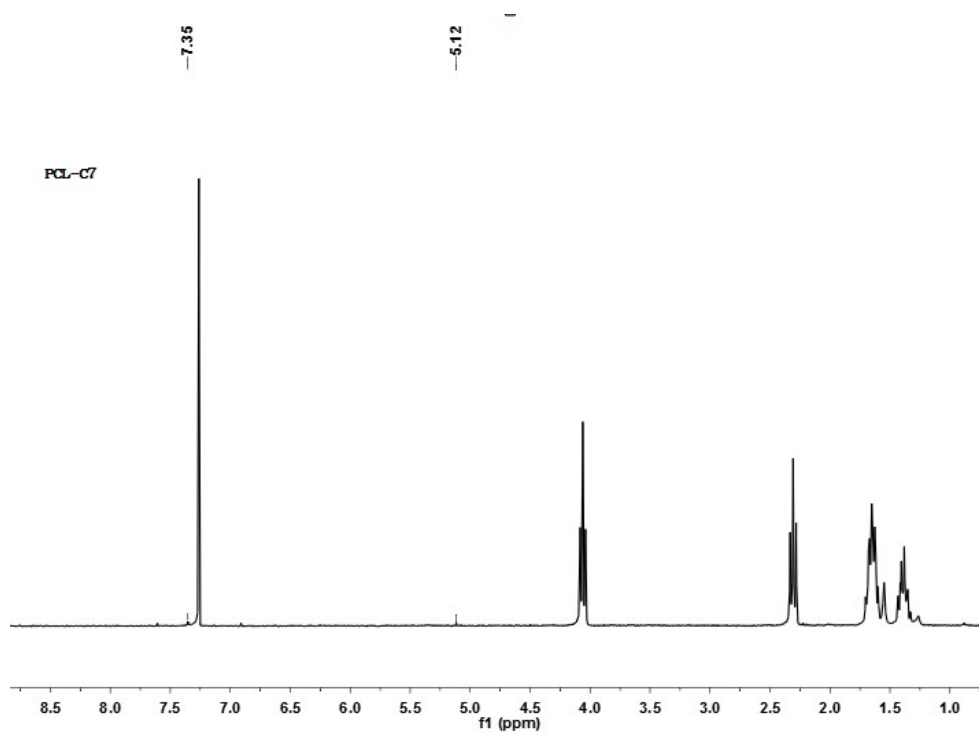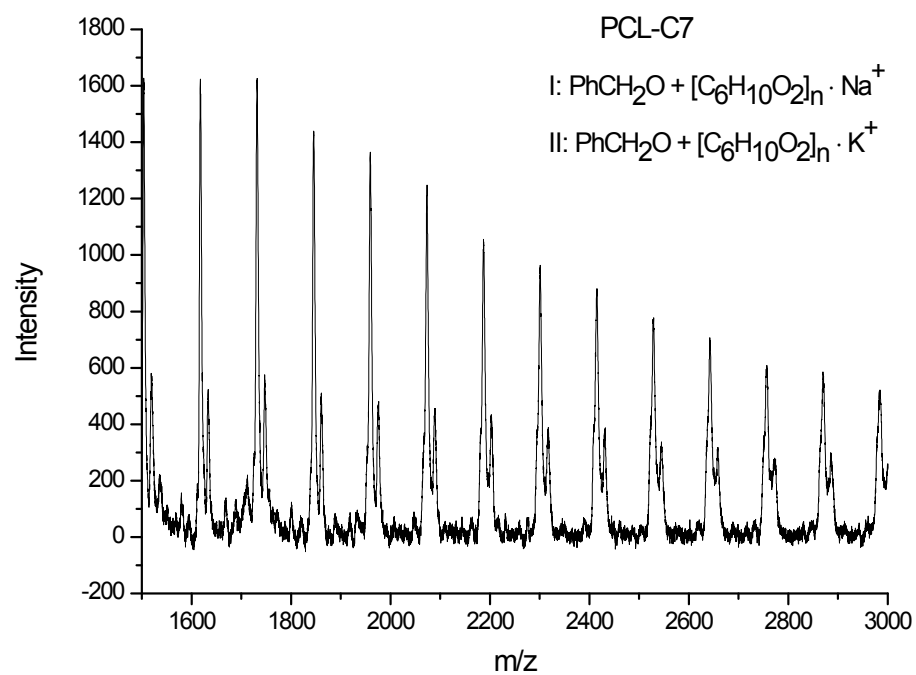

**Figure S16.** The  $^1\text{H}$  NMR and MALDI-TOF spectrum of PCL by C7
